# Supplementary material for: A combination of access to preassociation sites and local accumulation tendency in the direct vicinity of G-N7 controls the rate of platination of single-stranded DNA
Source: Royal Society of Chemistry journal article supplement (doi:10.1039/b418966c), 2005-01-01
Supplement: b418966c.pdf [file b418966c.pdf]

# A combination of access to preassociation sites and local accumulation tendency in the direct vicinity of G-N7 controls the rate of platination of single-stranded DNA

Åse Sykfont Snygg<sup>a</sup>, Malgorzata Brindell<sup>a,b</sup>, Grazyna Stochel,<sup>b</sup> and Sofi K. C. Elmroth<sup>a\*</sup>

<sup>a\*</sup> *Inorganic Chemistry, Chemical Center, Lund University, P. O. Box 124, SE-221 00 Lund, Sweden.*

*Fax: 46 46 222 4439; Tel: 46 46 222 8106; E-mail: Sofi.Elmroth@inorg.lu.se*

<sup>b</sup> *Faculty of Chemistry, Jagiellonian University, Ingardena 3, 30-060 Krakow, Poland*

*This submission was created using the RSC Article Template (DO NOT DELETE THIS TEXT)  
(LINE INCLUDED FOR SPACING ONLY - DO NOT DELETE THIS TEXT)*

## SUPPLEMENTARY INFORMATION

### Derivation of rate law

Under present conditions with  $C_{Pt} \gg [DNA-G_{N7} \cdots M^{n+}]$

$$C_{Pt} = [Pt^+] + [DNA-P_i \cdots Pt^+] \quad (S1)$$

$$[DNA-P_i \cdots Pt^+] = K_{ass,i} [Pt^+] [DNA-P_i \cdots M^{n+}] / [M^{n+}] \quad (S2)$$

$$C_{Pt} = [Pt^+] + K_{ass,i} [Pt^+] [DNA-P_i \cdots M^{n+}] / [M^{n+}] \quad (S3)$$

$$[Pt^+] = C_{Pt} [M^{n+}] / ([M^{n+}] + K_{ass,i} [DNA-P_i \cdots M^{n+}]) \quad (S4)$$

Insertion of eq S4 into 4a gives eq S5

$$k_{obs} = k_2 K_{ass} C_{Pt} / ([M^{n+}] + K_{ass,i} [DNA-P_i \cdots M^{n+}]) \quad (S5)$$

Identification of the expression for  $k_{2,app}$  from eq 4b gives eq 7

$$k_{obs} = k_{2,app} C_{Pt} [M^{n+}] / ([M^{n+}] + K_{ass,i} [DNA-P_i \cdots M^{n+}]) \quad (7)$$

**Supporting information:** Derivation of rate equation assuming presence of non-productive phosphate-association.
